# Supplementary material for: Fission yeast Srr1 and Skb1 promote isochromosome formation at the centromere
Source: Research Square preprint supplement (doi:10.21203/rs.3.rs-2165921/v1), 2022-10-27
Supplement: Supplementary file 1 [file 4578a91a3196aed41494b5c6.xlsx]

## Sheet:  Table A
GCR rates
	wild type	srr1∆	skb1∆	rad51∆	srr1∆ rad51∆	skb1∆ rad51∆	srr1∆ skb1∆ rad51∆	srr1-WR rad51∆	skb1-AV rad51∆	srr1-WR skb1-AV rad51∆	rad52-R45K	srr1∆ rad52-R45K	rad52-RK rad51∆	srr1-WR rad52-RK rad51∆	pcn1-KR rad51∆	srr1-WR pcn1-KR rad51∆	skb1-FY rad51∆	skb1-EAEA rad51∆	skb1∆ rad52-RK	skb1∆ rad52-RK rad51∆	srr1-DAPA rad51∆	srr1-HA rad51∆
relative	1	0.577883	1.21046	117.955	16.9798	24.2212	6.13555	38.7634	83.591	9.22941	0.487515	0.348395	27.2869	17.0036	28.4185	13.3888	31.3912	27.3484	0.423306	19.6908	9.79786	25.6837
median	4.205e-05	2.43e-05	5.09e-05	0.00496	0.000714	0.0010185	0.000258	0.00163	0.003515	0.000388097	2.05e-05	1.465e-05	0.00114741	0.000715	0.001195	0.000563	0.00132	0.00115	1.78e-05	0.000828	0.000412	0.00108
1	3.33e-05	1.66e-05	0.000205	0.00169	0.000695	0.0146	0.000454	0.0027	0.0092	0.000234	2.37e-05	5.3e-06	0.000952387	0.000715	0.00179	0.000558	0.00107	0.00143	1.96e-05	0.000828	0.0021	0.000914
2	5.61e-05	4e-05	2.39e-05	0.00815	0.000619	0.000779	0.00117	0.00126	0.0103	0.000212	3.8e-05	8.16e-06	0.000840791	0.000288	0.00117	0.000649	0.00126	0.00226	3.01e-05	0.000827	0.000459	0.000481
3	3.39e-05	2.68e-05	3.09e-05	0.0172	0.00169	0.000451	0.000458	0.00163	0.0154	0.000342	1.67e-05	1.17e-05	0.00359439	0.000199	0.00125	0.000868	0.00156	0.00142	1e-05	0.00222	0.0006	0.000197
4	0.000103	0.000146	0.000107	0.0324	0.00146	0.000411	0.0003	0.000876	0.00642	0.000591	1.7e-05	1.36e-05	0.00154771	0.000472	0.00059	0.000299	0.00147	0.00314	3.01e-05	0.000733	0.00165	0.000628
5	2.19e-05	1.13e-05	1.23e-05	0.00112	0.00346	0.00104	0.000362	0.000775	0.00662	0.0003279	1.44e-05	2.22e-05	0.0044205	0.000496	0.00192	0.000417	0.00242	0.00255	3.74e-05	0.00207	0.00127	0.00141
6	3e-05	3.31e-05	2.17e-05	0.00353	0.000714	0.00123	0.000258	0.000955	0.0129	0.000447592	2.35e-05	1.21e-05	0.00455167	0.00043	0.00276	0.000504	0.00131	0.00137	1.28e-05	0.00182	0.016	1.56e-05
7	2.64e-05	5.36e-05	4.42e-05	0.00673	0.000196	0.000997	0.000221	0.00106	0.000284	0.000466401	3.12e-05	1.75e-05	0.0077352	0.000311	0.00115	0.000563	0.00122	0.000104	1.76e-05	0.000532	0.000277	0.00103
8	1.18e-05	3.32e-05	6.7e-06	0.0046	0.000351	0.00106	0.000142	0.00095	0.00313	0.000155014	1.97e-05	1.73e-05	0.00309	0.000524	0.00102	0.000589	0.000855	0.000199	5.54e-05	0.000337	0.00114	0.000893
9	7.39e-05	1.99e-05	5.09e-05	0.0173	0.000401	0.000569	0.000173	0.00284	0.00309	0.000230035	1.24e-05	2.9e-05	0.000871222	0.000819	0.00624	0.000673	0.00115	0.000241	1.78e-05	0.000436	0.00066	0.00134
10	4.16e-05	1.68e-05	6.13e-05	0.00278	0.00123	0.00227	0.000383	0.000745	0.00346	0.00026946	2.05e-05	2.98e-05	0.000912259	0.00091	0.000816	0.000394	0.00231	0.00321	1.17e-05	0.000683	7.8e-05	0.00194
11	4.25e-05	3.28e-05	3.79e-05	0.00363	0.00056	0.00194	0.000151	0.00168	0.00357	0.000356198	6.56e-05	3.11e-05	0.000730583	0.000877	0.00122	0.00118	0.00103	0.000845	6.69e-06	0.000576	0.000177	0.00113
12	4.02e-05	3.12e-05	8.34e-05	0.00333	0.0026	0.000664	0.000159	0.00261	0.000402	0.000419995	2.72e-05	1.5e-05	0.000888567	0.000765	0.000396	0.00256	0.00237	0.00101	1.12e-05	0.000701	0.000365	0.00932
13	0.000135	0.000154	6.04e-05	0.00286	0.00107	0.00179	0.000116	0.0012	0.0018	0.000847322	1.89e-05	2.15e-05	0.00109131	0.00094	0.00672	0.000621	0.00301	0.00301	2.58e-05	0.00137	0.000335	0.00743
14	5.54e-05	2.4e-05	9.06e-05	0.0152	0.000722	0.000509	6.87e-05	0.00183	0.0032	0.000577546	0.000364	1.43e-05	0.00175153	0.00159	0.000781	0.000547	0.00134	0.000873	0.000409	0.00241	0.000363	0.00123
15	7.17e-05	2.01e-05	5.09e-05	0.00315	0.00206	0.00108	0.00013	0.00243	0.00959	0.000719678	1.53e-05	1.04e-05	0.00120352	0.00114	0.00252	0.000511	0.000806	0.00115	1.62e-05	0.00679	0.000304	0.000936
16	7.31e-05	0.000146	6.74e-05	0.00252	0.000296	0.000589	0.000938	0.00641	0.00273	0.00098568	4.76e-05	1.11e-05	0.000404838	0.000497	0.000209	0.00137	0.00206	0.000963	1.98e-05	0.00226	0.00025	0.00123
17		1.7e-05		0.0211	0.000865		0.000594	0.00171			1.61e-05		0.0014309	0.0019		0.000129	0.00391	0.000951	1.21e-05	0.000389	0.000825
18		2.86e-05		0.0107	0.00027			0.000589					0.000591267	0.000822			0.000916			0.00224	6.18e-05
19		2.33e-05		0.00493	0.000993			0.00233					0.000910906	0.000672			0.00127			0.00387
20		1.71e-05		0.00793	0.00014								0.00164096				0.00146			0.0033
21		1.17e-05		0.00234	0.000351												0.00371			0.000392
22		1.63e-05		0.00302	0.000667												0.00708			0.000712
23		1.89e-05		0.00674	0.000794												0.00138			0.00193
24		1.44e-05		0.00243													0.000727
25		2.43e-05		0.00555													0.00132
26		2.05e-05		0.00319													0.00121
27		2.11e-05		0.0026													0.000954
28		2.74e-05		0.00319													0.00117
29		3.05e-05		0.0231													0.0013
30		3.17e-05		0.00176													0.00138
31		3.03e-05		0.00423													0.00554
32				0.00371
33				0.0111
34				0.0105
35				0.00889
36				0.00499
37				0.00723
38				0.0217
39				0.0072
40				0.00661
41				0.00342
42				0.0098
43				0.0259
44				0.00257
45				0.00225
46				0.00887
47				0.0111
48				0.00234

## Sheet: Table B
	Total GCR rates	Translocations	Truncations	Isochromosomes	rate of translocations	rate of translocation s	rate of translocation s	truncations (/rad51∆)	isochromosomes (/rad51∆)	p-value (vs rad51∆)
wild type	4.205e-05	1	0	31	1.31406e-06	0	4.07359e-05	0	0.00889379
rad51∆	0.00496196	0	6	72	0	0.000381689	0.00458027	1	1	N.A.
srr1∆ rad51∆	0.000714075	0	9	7	0	0.000401667	0.000312408	1.05234	0.0682074	<0.0001
skb1∆ rad51∆	0.00102056	0	6	10	0	0.000382709	0.000637848	1.00267	0.13926	0.0049
skb1-FY rad51∆	0.00132004	0	10	22	0	0.000412514	0.00090753	1.08076	0.198139	0.0028

## Sheet: Table C
Chromosome loss rates
	wild type	srr1∆	srr1-WR	skb1∆	rad51∆	srr1-WR rad51∆	skb1∆ rad51∆
relative	1	29.1444	7.86096	3.50267	69.5187	301.07	3.74332
median	0.000187	0.00545	0.00147	0.000655	0.013	0.0563	0.0007
1	0.000187	0.00144	0.00147	9.01e-05	0.00761	0.0302	0.000905
2	8.47e-05	0.00545	0.00308	0.000939	0.00616	0.0235	0.000508
3	0.000474	0.00592	0.00169	0.000485	0.0153	0.0893	0.0007
4	0.000108	0.00318	0.00142	0.000661	0.0112	0.0446	0.000276
5	0.000676	0.0583	0.00108	0.000655	0.026	0.0563	0.00121
6					0.0338	0.0812
7					0.013	0.0247
8					0.0543	0.0847
9					0.0108	0.0703

## Sheet: Table D
wild type	≥1 Rad52 focus	total nuclei	% total
1	79	476	0.165966
2	48	378	0.126984
3	63	338	0.186391
		mean	0.15978
srr1∆	≥1 Rad52 focus	total nuclei	% total
1	97	454	0.213656
2	89	412	0.216019
3	105	428	0.245327
		mean	0.225001
		t test	0.0319384
